# Supplementary material
Source: bioRxiv or medRxiv preprint supplement (https://medrxiv.org/highwire/filestream/71005/field_highwire_adjunct_files/0/2019.12.12.19014662-1.pdf)
Supplement: Supplementary file [file 2019.12.12.19014662-1.pdf]

## Supplemental file 1. Additional References (Relevant to differentiation / barrier related proteins presented in the Table 2).

### Antimicrobial peptides.

- Arijs I, De Hertogh G, Lemaire K, et al. Mucosal gene expression of antimicrobial peptides in inflammatory bowel disease before and after first infliximab treatment. *PLoS one*. 2009;4:e7984.
- Okumura R, Kurakawa T, Nakano T, et al. Lypd8 promotes the segregation of flagellated microbiota and colonic epithelia. *Nature*. 2016;532:117.
- Okumura R, Takeda K. Maintenance of intestinal homeostasis by mucosal barriers. *Inflammation and regeneration*. 2018;38:5.
- Yang Y, Jobin C. Novel insights into microbiome in colitis and colorectal cancer. *Current opinion in gastroenterology*. 2017 Nov;33:422-7.
- Cellier MF, Courville P, Champion C. Nramp1 phagocyte intracellular metal withdrawal defense. *Microbes and infection*. 2007;9:1662-70.
- Orsi N. The antimicrobial activity of lactoferrin: current status and perspectives. *Biometals*. 2004;17:189-96.
- Man SM, Karki R, Kanneganti TD. DNA-sensing inflammasomes: regulation of bacterial host defense and the gut microbiota. *Pathogens and disease*. 2016;74(4).
- Jasir A, Kasprzykowski F, Kasprzykowska R, et al. New antimicrobial cystatin C-based peptide active against gram-positive bacterial pathogens, including methicillin-resistant *Staphylococcus aureus* and multiresistant coagulase-negative staphylococci. *Apmis*. 2003;111:1004-10.
- Pulkkinen V, Bruce S, Rintahaka J, et al. ELMOD2, a candidate gene for idiopathic pulmonary fibrosis, regulates antiviral responses. *The FASEB Journal*. 2010;24:1167-77.

### Oxidative stress / Peroxiredoxins

- Guo F, He H, Fu ZC, et al. Adipocyte-derived PAMM suppresses macrophage inflammation by inhibiting MAPK signalling. *Biochem J*. 2015;472:309–318.
- Wang X, Phelan SA, Forsman-Semb K, et al. Mice with targeted mutation of peroxiredoxin 6 develop normally but are susceptible to oxidative stress. *Journal of Biological Chemistry*. 2003;278:25179-90.
- Geiszt M, Witta J, Baffi J, et al. Dual oxidases represent novel hydrogen peroxide sources supporting mucosal surface host defense. *The FASEB journal*. 2003;17:1502-4.
- Guan G, Lan S. Implications of Antioxidant Systems in Inflammatory Bowel Disease. *Biomed Res Int*. 2018;1290179. doi:10.1155/2018/1290179

### CD44

- Naor D, Nedvetzki S, Golan I, et al. CD44 in cancer. *Crit Rev Clin Lab Sci*. 2002;39:527–79.

### Apolipoprotein A-I

- Meriwether D, Sulaiman D, Volpe C, et al. Apolipoprotein AI mimetics mitigate intestinal inflammation in COX2-dependent inflammatory bowel disease model. *J Clin Invest*. 2019;130:3670-3685.

## SGLT-1 / SLC15A1

- Yu, Linda CH, et al. SGLT-1-mediated glucose uptake protects intestinal epithelial cells against LPS-induced apoptosis and barrier defects: a novel cellular rescue mechanism?. *The FASEB Journal*. 2005;19:1822-1835.
- Zietek T, Daniel H. Intestinal nutrient sensing and blood glucose control. *Current Opinion in Clinical Nutrition & Metabolic Care*. 2015;18:381-8.
- Zucchelli M, Torkvist L, Bresso F, et al. PepT1 oligopeptide transporter (SLC15A1) gene polymorphism in inflammatory bowel disease. *Inflammatory bowel diseases*. 2009;15:1562-9.

## Zo / Myosin.

- Cordenonsi M, D'Atri F, Hammar E, et al. Cingulin contains globular and coiled-coil domains and interacts with ZO-1, ZO-2, ZO-3, and myosin. *J Cell Biol*. 1999;147:1569–1582.
- Liu KC, Cheney RE. Myosins in cell junctions. *Bioarchitecture*. 2012;2:158–170.
- Vicente-Manzanares M, Ma X, Adelstein RS, et al. Non-muscle myosin II takes centre stage in cell adhesion and migration. *Nature reviews Molecular cell biology*. 2009;10:778.

## CD99.

- Guangxi Zhou, Wenjing Yang, Lin Yu, et al. CD99 refers to the activity of inflammatory bowel disease, *Scandinavian Journal of Gastroenterology*, 2017;52:359-364

## Meprin A.

- Coskun, Mehmet, et al. TNF- $\alpha$ -induced down-regulation of CDX2 suppresses MEP1A expression in colitis. *Biochimica et Biophysica Acta (BBA)-Molecular Basis of Disease* 2012;1822:843-851.
- Coskun M. Intestinal epithelium in inflammatory bowel disease. *Frontiers in medicine*. 2014;25;1:24.

## Mucins / Trefoil factors.

- Hensel KO, Boland V, Postberg J, et al. Differential expression of mucosal trefoil factors and mucins in pediatric inflammatory bowel diseases. *Scientific reports*. 2014;4:7343.
- Loncar MB, Al-Azzeh ED, Sommer PS, et al. Tumour necrosis factor  $\alpha$  and nuclear factor  $\kappa$ B inhibit transcription of human TFF3 encoding a gastrointestinal healing peptide. *Gut*. 2003;52:1297-303.
- Xue L, Aihara E, Wang TC, et al. Trefoil factor 2 requires Na/H exchanger 2 activity to enhance mouse gastric epithelial repair. *Journal of Biological Chemistry*. 2011;286:38375-82.

Additional;

Cell-Cell Junction Organization.

- Garcia MA, Nelson WJ, Chavez N. Cell-Cell Junctions Organize Structural and Signaling Networks. *Cold Spring Harb Perspect Biol.* 2018;10.
- Koster J, Geerts D, Favre B, et al. Analysis of the interactions between BP180, BP230, plectin and the integrin  $\alpha 6\beta 4$  important for hemidesmosome assembly. *Journal of cell science.* 2003;116:387-99.

#### Inflammation.

- Mitsuyama K, Toyonaga A, Sasaki E, et al. IL-8 as an important chemoattractant for neutrophils in ulcerative colitis and Crohn's disease. *Clin Exp Immunol.* 1994;96:432–436.
- Zietek T, Rath E. Inflammation Meets Metabolic Disease: Gut Feeling Mediated by GLP-1. *Front Immunol.* 2016;7:154.
- Plevy S, Silverberg MS, Lockton S, et al. Combined serological, genetic, and inflammatory markers differentiate non-IBD, Crohn's disease, and ulcerative colitis patients. *Inflamm Bowel Dis.* 2013;19:1139–1148.
- Palone F, Vitali R, Cucchiara S, et al. Fecal HMGB1 reveals microscopic inflammation in adult and pediatric patients with inflammatory bowel disease in clinical and endoscopic remission. *Inflammatory bowel diseases.* 2016;22:2886-93.
- Zhu S, Ding S, Wang P, et al. Nlrp9b inflammasome restricts rotavirus infection in intestinal epithelial cells. *Nature.* 2017;546:667.
- Daig R, Andus T, Aschenbrenner E, et al. Increased interleukin 8 expression in the colon mucosa of patients with inflammatory bowel disease. *Gut.* 1996;38:216-22.

**Supplement Table 1.** Mineral analysis of Aquamin® Soluble.

| Element    | µg/g    | Element      | µg/g   | Element   | µg/g  |
|------------|---------|--------------|--------|-----------|-------|
| Aluminum   | 21.6    | Hafnium      | 0.038  | Rubidium  | 0.031 |
| Antimony   | 0.69    | Holmium      | 0.010  | Ruthenium | 0.137 |
| Arsenic    | 0.239   | Indium       | <0.001 | Samarium  | 0.037 |
| Barium     | 1.76    | Iodine       | 1.81   | Scandium  | 0.469 |
| Beryllium  | <0.5    | Iridium      | <0.001 | Selenium  | <0.5  |
| Bismuth    | <0.5    | Iron         | 143    | Silicon   | 16.8  |
| Boron      | 13.7    | Lanthanum    | <0.5   | Silver    | <0.5  |
| Cadmium    | 0.220   | Lead         | 0.084  | Sodium    | 2,206 |
| Calcium    | 117,000 | Lithium      | <0.5   | Strontium | 882   |
| Carbon     | 26,600  | Lutetium     | <0.001 | Sulfur    | 1,241 |
| Cerium     | 0.314   | Magnesium    | 10,210 | Tantalum  | 0.043 |
| Cesium     | 0.001   | Manganese    | 25.4   | Tellurium | <0.5  |
| Chloride   | 612     | Mercury      | <0.001 | Terbium   | 0.007 |
| Chromium   | <0.5    | Molybdenum   | <0.5   | Thallium  | <0.5  |
| Cobalt     | <0.5    | Neodymium    | 0.170  | Thorium   | 1.30  |
| Copper     | <0.5    | Nickel       | 0.75   | Thulium   | 0.004 |
| Dysprosium | 0.045   | Niobium      | <0.5   | Tin       | 0.029 |
| Erbium     | 0.033   | Osmium       | <0.001 | Titanium  | 11.4  |
| Europium   | 0.013   | Palladium    | 0.179  | Tungsten  | <0.5  |
| Fluoride   | 3.57    | Phosphorous  | 189    | Vanadium  | <0.5  |
| Gadolinium | 0.044   | Platinum     | <0.001 | Ytterbium | 0.030 |
| Gallium    | 0.307   | Potassium    | 70.0   | Yttrium   | <0.5  |
| Germanium  | <0.001  | Praseodymium | 0.040  | Zinc      | 6.07  |
| Gold       | <0.5    | Rhenium      | 0.001  | Zirconium | <0.5  |
|            |         | Rhodium      | 0.061  |           |       |

Source: 2017 Test Certificate for Aquamin® Soluble, assessed by Advanced Laboratories, Inc. (Salt Lake City), for client Marigot Limited (Ireland).

**Supplement Table 2. Antibodies used for quantitative immunohistochemistry (IHC)**

| <u>Antibody</u>                                 | <u>Vendor</u> | <u>Catalog #</u> | <u>Dilution</u> | <u>Incubation Time</u> | <u>Retrieval Method</u>          |
|-------------------------------------------------|---------------|------------------|-----------------|------------------------|----------------------------------|
| Ms <u>CK20</u> mAb clone K <sub>s</sub> 20.8    | Dako          | M7019            | 1:100           | 60 min                 | FLEX TRS High pH 9.0, 20 min     |
| Rb <u>Desmoglein-2</u> pAb                      | Sigma         | HPA004896        | 1:200           | 30 min                 | <sup>a</sup> HIER pH 6.0         |
| Rb <u>Ki-67</u> mAb clone SP6                   | Cell Marque   | 275R-16          | 1:250           | 30 min                 | <sup>b</sup> HIER pH 9.0, 20 min |
| Rb <u>LI Cadherin</u> (CDH17) mAb clone EPR3996 | abcam         | Ab109190         | 1:250           | 60 min                 | <sup>b</sup> HIER pH 9.0         |

---

<sup>a</sup>HIER pH 6: Heat induced epitope retrieval Citrate buffer pH6

<sup>b</sup>HIER pH 9: Heat induced epitope retrieval 10 mM Tris HCl/1 mM EDTA buffer pH9

**Supplement Table 3. Altered (and common) proteins among different concentrations of Aquamin®**

| Proteins                                                                                             | Aquamin    |            |            |            |
|------------------------------------------------------------------------------------------------------|------------|------------|------------|------------|
|                                                                                                      | 1.5mM      | 2.1mM      | 3.0mM      | 4.5mM      |
| <b>Proteins common with all 4 concentrations (Aquamin 1.5, 2.1, 3.0, 4.5 mM) (3 common proteins)</b> |            |            |            |            |
| Cadherin-17                                                                                          | *2.83±0.22 | *2.95±0.60 | *3.24±0.67 | *3.62±0.70 |
| Desmoglein-2                                                                                         | *2.07±0.17 | *2.10±0.25 | *2.28±0.37 | *2.36±0.40 |
| Ly6/PLAUR domain-containing protein 8                                                                | *2.12±0.22 | *2.14±0.50 | *2.46±0.40 | *2.64±0.93 |
| <b>Proteins common with 3 concentrations (Aquamin 2.1, 3.0, 4.5 mM) (6 common proteins)</b>          |            |            |            |            |
| Calcium-activated chloride channel regulator 4                                                       | *2.03±0.28 | *2.24±0.51 | *2.31±0.27 | *3.01±0.74 |
| Natural resistance-associated macrophage protein 2                                                   | *1.91±0.42 | *2.20±0.43 | *2.56±0.36 | *2.68±0.54 |
| CEACAM7                                                                                              | *1.84±0.32 | *2.00±0.08 | *2.23±0.37 | *2.44±0.50 |
| Fibrinogen silencer-binding protein                                                                  | *0.61±0.09 | *0.44±0.10 | *0.36±0.03 | *0.22±0.13 |
| Neurogranin                                                                                          | *0.54±0.05 | *0.38±0.16 | *0.30±0.13 | *0.18±0.09 |
| Stathmin                                                                                             | *0.58±0.07 | *0.47±0.02 | *0.37±0.01 | *0.29±0.12 |
| <b>Proteins common with 2 concentrations (Aquamin 3.0, 4.5 mM) (21 common proteins)</b>              |            |            |            |            |
| Zinc transporter ZIP4                                                                                | *2.01±0.55 | *2.08±0.46 | *2.63±0.77 | *2.83±0.96 |
| Apolipoprotein A-I                                                                                   | 1.62±0.61  | *1.96±0.46 | *2.39±0.28 | *2.68±0.30 |
| Nuclear receptor subfamily 0 group B member 1                                                        | 2.59±1.13  | 5.71±3.91  | 4.69±2.45  | 6.68±4.11  |
| Protein RRP5 homolog (NF-kappa-B-binding protein)                                                    | *0.72±0.03 | *0.54±0.12 | *0.44±0.15 | *0.41±0.06 |
| DNA replication licensing factor MCM3                                                                | *0.70±0.07 | *0.57±0.06 | *0.44±0.07 | *0.34±0.13 |
| Heterogeneous nuclear ribonucleoprotein D-like                                                       | *0.69±0.06 | *0.59±0.02 | *0.50±0.04 | *0.42±0.11 |
| Serine/arginine-rich splicing factor 6                                                               | *0.67±0.15 | *0.56±0.11 | *0.47±0.10 | *0.37±0.10 |
| Nucleophosmin                                                                                        | *0.59±0.06 | *0.55±0.06 | *0.43±0.04 | *0.35±0.09 |
| Proliferating cell nuclear antigen                                                                   | *0.65±0.01 | *0.59±0.08 | *0.45±0.05 | *0.36±0.10 |
| Nucleolar RNA helicase 2                                                                             | *0.63±0.07 | *0.52±0.12 | *0.43±0.06 | *0.34±0.04 |
| Proliferation marker protein Ki-67                                                                   | *0.58±0.08 | *0.48±0.11 | *0.39±0.13 | *0.31±0.08 |
| Nuclear autoantigenic sperm protein                                                                  | *0.66±0.07 | *0.57±0.03 | *0.45±0.03 | *0.37±0.11 |
| U3 small nucleolar RNA-interacting protein 2                                                         | *0.62±0.03 | *0.51±0.06 | *0.38±0.01 | *0.32±0.10 |
| SWI/SNF complex subunit SMARCC1                                                                      | *0.69±0.08 | *0.54±0.07 | *0.48±0.04 | *0.41±0.13 |
| Translation machinery-associated protein 7                                                           | *0.63±0.07 | *0.57±0.10 | *0.49±0.06 | *0.44±0.09 |
| Nucleolin                                                                                            | *0.70±0.09 | *0.57±0.02 | *0.48±0.04 | *0.41±0.11 |
| Inosine-5'-monophosphate dehydrogenase 2                                                             | *0.63±0.03 | *0.56±0.13 | *0.43±0.11 | *0.35±0.12 |
| Nucleolar and coiled-body phosphoprotein 1                                                           | *0.63±0.05 | *0.53±0.06 | *0.44±0.06 | *0.37±0.10 |
| PC4 and SFRS1-interacting protein                                                                    | *0.72±0.10 | *0.56±0.05 | *0.48±0.05 | *0.41±0.12 |
| Receptor-type tyrosine-protein phosphatase F                                                         | *0.56±0.09 | *0.55±0.11 | *0.50±0.08 | *0.45±0.07 |
| Cytokine-induced protein with coiled-coil domain                                                     | *0.69±0.02 | *0.52±0.13 | *0.45±0.10 | *0.42±0.11 |
| <b>Proteins common with 1 concentration (Aquamin 2.1 mM) (7 common proteins)</b>                     |            |            |            |            |
| Aminopeptidase N                                                                                     | *1.91±0.21 | *2.01±0.25 | *1.85±0.27 | *2.00±0.36 |
| Meprin A subunit alpha                                                                               | *1.91±0.36 | *2.02±0.27 | *2.32±0.71 | 2.37±0.96  |
| CEACAM1                                                                                              | 1.72±0.52  | 5.25±4.20  | 2.01±1.12  | 1.80±1.18  |
| CEACAM 5                                                                                             | 1.37±0.29  | *2.37±0.51 | 1.81±0.79  | 1.71±0.82  |
| CEACAM 6                                                                                             | 1.25±0.35  | *2.13±0.35 | 1.50±0.78  | 1.33±0.80  |
| Leucine zipper putative tumor suppressor 1                                                           | 0.92±0.26  | 1.54±1.98  | 1.98±2.19  | 1.46±0.98  |
| Cyclic AMP-dependent transcription factor ATF-7                                                      | *1.37±0.13 | *2.25±0.37 | *1.76±0.45 | 1.74±0.57  |
| <b>Proteins common with 1 concentration (Aquamin 3.0 mM) (1 common proteins)</b>                     |            |            |            |            |
| Integrin alpha-5                                                                                     | *1.69±0.42 | *1.80±0.26 | *2.21±0.58 | *2.27±0.67 |
| <b>Proteins common with 1 concentration (Aquamin 4.5 mM) (33 common proteins)</b>                    |            |            |            |            |
| Sodium/glucose cotransporter 1                                                                       | *1.40±0.16 | *1.73±0.10 | *1.94±0.37 | *2.20±0.28 |
| Laminin subunit alpha-1                                                                              | *2.00±0.62 | *2.15±0.38 | *2.00±0.49 | *2.59±0.44 |
| Laminin subunit beta-1                                                                               | *2.14±0.70 | *2.20±0.48 | *2.12±0.56 | *2.85±0.42 |
| Laminin subunit beta-2                                                                               | *1.91±0.49 | *2.03±0.34 | *1.90±0.30 | *2.32±0.30 |
| Laminin subunit gamma-1                                                                              | *2.03±0.58 | *2.07±0.37 | *2.01±0.47 | *2.68±0.30 |
| Nidogen-1 (Entactin)                                                                                 | 1.70±0.49  | *1.66±0.37 | *1.72±0.37 | *2.11±0.28 |
| HMG-CoA synthase, mitochondrial                                                                      | *1.52±0.12 | *1.74±0.23 | *1.95±0.22 | *2.09±0.18 |
| E-NPP 3                                                                                              | *1.41±0.15 | *1.60±0.18 | *1.81±0.19 | *2.04±0.25 |

|                                                    |            |            |            |            |
|----------------------------------------------------|------------|------------|------------|------------|
| Copper-transporting ATPase 2                       | 1.39±0.52  | *1.62±0.22 | *1.94±0.16 | *2.28±0.04 |
| Beta-glucuronidase                                 | *1.29±0.06 | *1.51±0.23 | *1.51±0.17 | *2.00±0.27 |
| Keratin, type I cytoskeletal 16                    | 0.93±0.32  | 0.72±0.37  | 0.57±0.42  | 1.37±0.91  |
| Ribosome biogenesis protein BMS1 homolog           | 0.92±0.32  | 0.79±0.34  | *0.61±0.15 | *0.49±0.04 |
| Ras GTPase-activating protein-binding protein 1    | *0.75±0.07 | *0.61±0.10 | *0.55±0.09 | *0.47±0.10 |
| HEAT repeat-containing protein 1                   | *0.69±0.17 | *0.64±0.08 | *0.55±0.07 | *0.43±0.03 |
| DNA replication licensing factor MCM4              | *0.70±0.02 | *0.67±0.09 | *0.52±0.07 | *0.43±0.10 |
| Non-histone chromosomal protein HMG-17             | *0.73±0.05 | *0.55±0.18 | *0.49±0.16 | *0.43±0.13 |
| Ribosome biogenesis protein WDR12                  | *0.77±0.11 | *0.67±0.10 | *0.58±0.04 | *0.47±0.05 |
| DNA replication licensing factor MCM5              | *0.70±0.10 | *0.57±0.18 | *0.49±0.16 | *0.40±0.13 |
| Probable 28S rRNA (NOP2)                           | *0.74±0.06 | *0.60±0.09 | *0.51±0.06 | *0.43±0.12 |
| Nucleolar GTP-binding protein 2                    | *0.59±0.01 | *0.64±0.15 | *0.55±0.04 | *0.30±0.08 |
| Putative RNA-binding protein Luc7-like 1           | *0.69±0.07 | *0.72±0.11 | *0.58±0.15 | *0.47±0.07 |
| CD44 antigen                                       | *0.61±0.01 | *0.58±0.12 | *0.48±0.12 | *0.40±0.09 |
| DNA replication licensing factor MCM7              | *0.77±0.08 | 0.74±0.23  | *0.56±0.23 | *0.41±0.12 |
| Palmitoyl-protein thioesterase 1                   | *0.66±0.03 | *0.63±0.05 | *0.60±0.03 | *0.49±0.05 |
| CD99 antigen                                       | *0.78±0.03 | *0.64±0.10 | *0.59±0.10 | *0.39±0.04 |
| Pumilio homolog 3                                  | 0.78±0.25  | *0.70±0.06 | *0.46±0.14 | *0.33±0.19 |
| Heterogeneous nuclear ribonucleoprotein A0         | *0.71±0.09 | *0.55±0.19 | *0.49±0.20 | *0.39±0.16 |
| DNA replication licensing factor MCM2              | *0.70±0.06 | *0.62±0.16 | *0.47±0.15 | *0.32±0.11 |
| Importin subunit alpha-1                           | *0.70±0.08 | *0.66±0.11 | *0.57±0.05 | *0.48±0.04 |
| Ribonucleoside-diphosphate reductase large subunit | *0.68±0.06 | *0.56±0.21 | *0.46±0.14 | *0.35±0.15 |
| Serine/threonine-protein kinase VRK1               | *0.70±0.07 | *0.61±0.11 | *0.52±0.11 | *0.41±0.12 |
| Gem-associated protein 5                           | *0.82±0.11 | *0.65±0.13 | *0.53±0.16 | *0.47±0.11 |
| Transformer-2 protein homolog beta                 | 0.85±0.24  | *0.56±0.07 | *0.53±0.04 | *0.48±0.06 |

These values represent average fold change (of abundance ratio) compared to control conditions (0.15 mM calcium) ± SDs. These proteins were up-regulated by 1.8-fold or greater across the three colonoids. \*Represents significance in up-regulation as compared to the control at  $p < 0.05$  level.

**Supplement Table 4. Most significant altered proteins with Aquamin® (p value <0.05 across all conditions)**

| Proteins                                                          | p value<br>(Nested) | Aquamin     |             |             |             |
|-------------------------------------------------------------------|---------------------|-------------|-------------|-------------|-------------|
|                                                                   |                     | 1.5mM       | 2.1mM       | 3.0mM       | 4.5mM       |
| Poly(U)-binding-splicing factor PUF60                             | 0.00003             | 0.835±0.001 | 0.794±0.062 | 0.714±0.043 | 0.670±0.037 |
| Superoxide dismutase, mitochondrial                               | 0.00004             | 1.272±0.106 | 1.427±0.141 | 1.418±0.065 | 1.556±0.007 |
| Ribosomal L1 domain-containing protein 1                          | 0.00004             | 0.658±0.003 | 0.592±0.068 | 0.504±0.078 | 0.444±0.136 |
| Nucleolar protein 56                                              | 0.00004             | 0.756±0.002 | 0.749±0.069 | 0.682±0.086 | 0.598±0.101 |
| Solute carrier family 12 member 2                                 | 0.00005             | 0.766±0.078 | 0.711±0.020 | 0.661±0.003 | 0.573±0.066 |
| ELAV-like protein 1                                               | 0.0001              | 0.800±0.016 | 0.748±0.026 | 0.678±0.003 | 0.615±0.067 |
| KHDRBS1                                                           | 0.0001              | 0.808±0.039 | 0.782±0.003 | 0.753±0.005 | 0.712±0.056 |
| Stathmin                                                          | 0.0001              | 0.576±0.072 | 0.466±0.019 | 0.371±0.006 | 0.285±0.122 |
| IST1 homolog                                                      | 0.0001              | 1.187±0.004 | 1.127±0.030 | 1.243±0.035 | 1.261±0.115 |
| Methylglutaconyl-CoA hydratase, mitochondrial                     | 0.0001              | 1.162±0.038 | 1.246±0.006 | 1.282±0.062 | 1.241±0.092 |
| U3 small nucleolar RNA-interacting protein 2                      | 0.0001              | 0.622±0.026 | 0.505±0.061 | 0.378±0.007 | 0.319±0.098 |
| Splicing factor 3B subunit 2                                      | 0.0002              | 0.819±0.048 | 0.732±0.005 | 0.707±0.005 | 0.628±0.065 |
| Glycylpeptide N-tetradecanoyltransferase 1                        | 0.0002              | 0.869±0.033 | 0.842±0.005 | 0.843±0.003 | 0.751±0.032 |
| Eukaryotic peptide chain release factor GTP-binding subunit ERF3A | 0.0002              | 0.835±0.036 | 0.773±0.005 | 0.706±0.036 | 0.656±0.072 |
| Cold shock domain-containing protein E1                           | 0.0002              | 0.901±0.024 | 0.866±0.037 | 0.795±0.005 | 0.754±0.057 |
| Zinc finger CCCH domain-containing protein 15                     | 0.0003              | 0.778±0.010 | 0.710±0.018 | 0.676±0.008 | 0.629±0.050 |
| Rab GTPase-binding effector protein 1                             | 0.0003              | 0.825±0.037 | 0.817±0.024 | 0.741±0.007 | 0.710±0.021 |
| Leucine-rich repeat-containing protein 40                         | 0.0003              | 0.855±0.054 | 0.803±0.027 | 0.776±0.006 | 0.708±0.008 |
| Unconventional myosin-XVB                                         | 0.0003              | 1.257±0.093 | 1.246±0.068 | 1.322±0.011 | 1.344±0.133 |
| Acid sphingomyelinase-like phosphodiesterase 3a                   | 0.0004              | 1.411±0.102 | 1.356±0.137 | 1.356±0.014 | 1.327±0.130 |
| Thyroid hormone receptor-associated protein 3                     | 0.0004              | 0.764±0.023 | 0.695±0.017 | 0.662±0.009 | 0.588±0.055 |
| Band 4.1-like protein 2                                           | 0.0004              | 0.807±0.018 | 0.760±0.007 | 0.723±0.011 | 0.681±0.064 |
| Signal recognition particle 9 kDa protein                         | 0.0005              | 0.740±0.041 | 0.650±0.037 | 0.596±0.012 | 0.528±0.077 |
| Succinate dehydrogenase flavoprotein subunit, mitochondrial       | 0.0005              | 1.073±0.003 | 1.124±0.051 | 1.171±0.042 | 1.176±0.066 |
| RNA-binding protein EWS                                           | 0.001               | 0.857±0.051 | 0.767±0.040 | 0.735±0.009 | 0.688±0.045 |
| 40S ribosomal protein S6                                          | 0.001               | 0.738±0.058 | 0.743±0.009 | 0.665±0.021 | 0.640±0.085 |
| CD44 antigen                                                      | 0.001               | 0.610±0.012 | 0.575±0.121 | 0.482±0.116 | 0.396±0.092 |
| Leydig cell tumor 10 kDa protein homolog                          | 0.001               | 0.669±0.010 | 0.633±0.016 | 0.556±0.023 | 0.494±0.069 |
| E3 ubiquitin-protein ligase RBBP6                                 | 0.001               | 0.799±0.007 | 0.691±0.063 | 0.687±0.093 | 0.640±0.085 |
| 2,4-dienoyl-CoA reductase, mitochondrial                          | 0.001               | 1.12±0.0290 | 1.127±0.017 | 1.177±0.008 | 1.216±0.079 |
| TATA-binding protein-associated factor 2N                         | 0.001               | 0.732±0.050 | 0.633±0.012 | 0.569±0.048 | 0.495±0.104 |
| 40S ribosomal protein S17                                         | 0.001               | 0.798±0.039 | 0.747±0.025 | 0.689±0.011 | 0.648±0.045 |
| Thymidylate kinase                                                | 0.001               | 0.832±0.007 | 0.774±0.010 | 0.732±0.029 | 0.647±0.050 |



|                                                                 |       |             |             |             |             |
|-----------------------------------------------------------------|-------|-------------|-------------|-------------|-------------|
| Plectin                                                         | 0.001 | 1.273±0.096 | 1.454±0.077 | 1.434±0.142 | 1.506±0.027 |
| Ubiquitin-conjugating enzyme E2 E3                              | 0.001 | 0.725±0.096 | 0.584±0.014 | 0.539±0.046 | 0.524±0.054 |
| Very-long-chain 3-oxoacyl-CoA reductase                         | 0.001 | 1.284±0.014 | 1.418±0.135 | 1.532±0.110 | 1.533±0.142 |
| Acyl-coenzyme A thioesterase 1                                  | 0.001 | 1.162±0.037 | 1.239±0.022 | 1.248±0.012 | 1.238±0.047 |
| Alpha-methylacyl-CoA racemase                                   | 0.001 | 1.269±0.050 | 1.439±0.024 | 1.428±0.032 | 1.419±0.076 |
| Proliferating cell nuclear antigen                              | 0.001 | 0.648±0.013 | 0.589±0.079 | 0.451±0.047 | 0.364±0.102 |
| Hydroxymethylglutaryl-CoA synthase, cytoplasmic                 | 0.001 | 0.838±0.059 | 0.778±0.010 | 0.640±0.051 | 0.541±0.120 |
| Elongation factor 2                                             | 0.001 | 0.880±0.005 | 0.847±0.051 | 0.803±0.035 | 0.787±0.057 |
| Pituitary tumor-transforming gene 1 protein-interacting protein | 0.001 | 1.325±0.069 | 1.225±0.052 | 1.375±0.022 | 1.399±0.166 |
| Neuroplastin                                                    | 0.001 | 1.155±0.013 | 1.140±0.012 | 1.144±0.008 | 1.181±0.065 |
| Putative RNA-binding protein Luc7-like 2                        | 0.001 | 0.716±0.041 | 0.630±0.014 | 0.587±0.020 | 0.538±0.072 |
| Heterogeneous nuclear ribonucleoprotein A3                      | 0.001 | 0.831±0.046 | 0.720±0.012 | 0.706±0.033 | 0.635±0.080 |
| m7GpppX diphosphatase                                           | 0.001 | 0.778±0.032 | 0.733±0.049 | 0.679±0.013 | 0.597±0.061 |
| Heterogeneous nuclear ribonucleoprotein D-like                  | 0.001 | 0.692±0.064 | 0.585±0.016 | 0.496±0.036 | 0.418±0.107 |
| Lysosomal alpha-glucosidase                                     | 0.001 | 1.256±0.035 | 1.314±0.036 | 1.460±0.029 | 1.492±0.043 |
| SUMO-activating enzyme subunit 1                                | 0.001 | 0.785±0.037 | 0.736±0.027 | 0.698±0.014 | 0.615±0.082 |
| Carcinoembryonic antigen-related cell adhesion molecule 7       | 0.001 | 1.835±0.322 | 1.998±0.077 | 2.227±0.372 | 2.438±0.503 |
| U6 snRNA-associated Sm-like protein LSm2                        | 0.001 | 0.778±0.025 | 0.771±0.071 | 0.658±0.016 | 0.617±0.097 |
| Thiosulfate sulfurtransferase                                   | 0.001 | 1.209±0.013 | 1.273±0.111 | 1.357±0.112 | 1.420±0.203 |
| Matrin-3                                                        | 0.001 | 0.794±0.020 | 0.738±0.048 | 0.684±0.024 | 0.609±0.017 |
| Transcription factor BTF3                                       | 0.001 | 0.773±0.065 | 0.684±0.015 | 0.630±0.061 | 0.566±0.071 |
| Ran GTPase-activating protein 1                                 | 0.001 | 0.772±0.042 | 0.737±0.045 | 0.679±0.016 | 0.630±0.066 |
| Aldehyde dehydrogenase, mitochondrial                           | 0.001 | 1.167±0.031 | 1.240±0.016 | 1.252±0.037 | 1.282±0.063 |
| Eukaryotic translation initiation factor 5A-1                   | 0.001 | 0.798±0.034 | 0.730±0.014 | 0.669±0.042 | 0.626±0.087 |
| Chromobox protein homolog 3                                     | 0.001 | 0.730±0.027 | 0.681±0.017 | 0.600±0.019 | 0.558±0.093 |
| General transcription factor II-I                               | 0.001 | 0.743±0.068 | 0.646±0.024 | 0.587±0.019 | 0.538±0.102 |
| DnaJ homolog subfamily C member 8                               | 0.001 | 0.792±0.069 | 0.706±0.015 | 0.638±0.027 | 0.594±0.107 |
| Bcl-2-associated transcription factor 1                         | 0.001 | 0.792±0.036 | 0.716±0.016 | 0.668±0.017 | 0.610±0.033 |
| Acyl-CoA:lysophosphatidylglycerol acyltransferase 1             | 0.001 | 1.174±0.045 | 1.263±0.090 | 1.304±0.022 | 1.331±0.105 |
| Serine-threonine kinase receptor-associated protein             | 0.001 | 0.822±0.050 | 0.772±0.013 | 0.721±0.036 | 0.686±0.078 |
| Alpha-taxilin                                                   | 0.001 | 0.842±0.033 | 0.786±0.012 | 0.719±0.085 | 0.682±0.060 |
| Maestro heat-like repeat-containing protein family member 1     | 0.001 | 1.135±0.027 | 1.315±0.022 | 1.354±0.060 | 1.331±0.092 |
| Rap1 GTPase-GDP dissociation stimulator 1                       | 0.001 | 0.810±0.037 | 0.795±0.036 | 0.725±0.015 | 0.677±0.023 |
| Drebrin                                                         | 0.001 | 0.704±0.079 | 0.599±0.045 | 0.585±0.020 | 0.534±0.085 |
| General transcription factor IIF subunit 1                      | 0.001 | 0.804±0.039 | 0.766±0.034 | 0.687±0.017 | 0.677±0.067 |
| Clustered mitochondria protein homolog                          | 0.001 | 0.828±0.010 | 0.750±0.047 | 0.668±0.021 | 0.610±0.061 |
| Nuclear autoantigenic sperm protein                             | 0.002 | 0.657±0.069 | 0.565±0.028 | 0.452±0.025 | 0.374±0.110 |

|                                                               |       |             |             |             |             |
|---------------------------------------------------------------|-------|-------------|-------------|-------------|-------------|
| Poly(rC)-binding protein 2                                    | 0.002 | 0.781±0.018 | 0.690±0.063 | 0.662±0.019 | 0.621±0.048 |
| DNA topoisomerase 2-beta                                      | 0.002 | 0.769±0.016 | 0.740±0.062 | 0.676±0.018 | 0.566±0.081 |
| Luc7-like protein 3                                           | 0.002 | 0.768±0.044 | 0.652±0.077 | 0.618±0.044 | 0.531±0.023 |
| Heterogeneous nuclear ribonucleoprotein M                     | 0.002 | 0.797±0.047 | 0.718±0.017 | 0.680±0.022 | 0.588±0.079 |
| U2 small nuclear ribonucleoprotein B''                        | 0.002 | 0.813±0.012 | 0.760±0.017 | 0.719±0.025 | 0.679±0.028 |
| DNA replication licensing factor MCM4                         | 0.002 | 0.701±0.018 | 0.666±0.091 | 0.522±0.065 | 0.432±0.097 |
| Multidrug resistance protein 1                                | 0.002 | 1.297±0.032 | 1.451±0.039 | 1.547±0.091 | 1.698±0.216 |
| Serine beta-lactamase-like protein LACTB, mitochondrial       | 0.002 | 1.176±0.049 | 1.307±0.105 | 1.288±0.034 | 1.313±0.026 |
| Keratin, type II cytoskeletal 8                               | 0.002 | 1.25±0.0980 | 1.524±0.092 | 1.433±0.037 | 1.488±0.103 |
| UDP-glucuronosyltransferase 1-10                              | 0.002 | 1.298±0.131 | 1.327±0.143 | 1.388±0.033 | 1.394±0.138 |
| Nuclear pore complex protein Nup155                           | 0.002 | 0.832±0.011 | 0.832±0.059 | 0.800±0.063 | 0.801±0.046 |
| Protein mono-ADP-ribosyltransferase PARP4                     | 0.002 | 1.173±0.024 | 1.178±0.014 | 1.235±0.047 | 1.273±0.104 |
| Polyadenylate-binding protein 1                               | 0.002 | 0.826±0.012 | 0.788±0.071 | 0.736±0.039 | 0.713±0.071 |
| Integrin alpha-3                                              | 0.002 | 0.919±0.027 | 0.903±0.028 | 0.859±0.010 | 0.868±0.035 |
| Cadherin-17                                                   | 0.002 | 2.834±0.216 | 2.952±0.600 | 3.235±0.672 | 3.616±0.703 |
| Nucleolin                                                     | 0.002 | 0.697±0.092 | 0.573±0.024 | 0.478±0.043 | 0.409±0.112 |
| Tubulin beta chain                                            | 0.002 | 0.758±0.031 | 0.715±0.046 | 0.644±0.051 | 0.587±0.024 |
| 60S ribosomal protein L36                                     | 0.002 | 0.728±0.058 | 0.727±0.018 | 0.660±0.074 | 0.588±0.087 |
| Kynurenine--oxoglutarate transaminase 3                       | 0.002 | 0.865±0.038 | 0.849±0.019 | 0.845±0.011 | 0.790±0.044 |
| NADH dehydrogenase 1 alpha subcomplex assembly factor 2       | 0.002 | 0.795±0.016 | 0.792±0.034 | 0.731±0.018 | 0.700±0.080 |
| tRNA (cytosine(34)-C(5))-methyltransferase                    | 0.002 | 0.811±0.031 | 0.793±0.040 | 0.730±0.018 | 0.661±0.050 |
| Proteasome activator complex subunit 3                        | 0.002 | 0.786±0.020 | 0.701±0.025 | 0.618±0.023 | 0.563±0.088 |
| Serotransferrin                                               | 0.002 | 1.375±0.034 | 1.442±0.160 | 1.497±0.219 | 1.568±0.271 |
| Elongation factor 1-alpha 1                                   | 0.002 | 0.871±0.010 | 0.858±0.046 | 0.780±0.052 | 0.750±0.076 |
| La-related protein 4B                                         | 0.002 | 0.781±0.050 | 0.700±0.020 | 0.674±0.071 | 0.639±0.056 |
| ADP-ribosylation factor-like protein 3                        | 0.002 | 0.720±0.057 | 0.781±0.067 | 0.732±0.033 | 0.621±0.024 |
| Disintegrin and metalloproteinase domain-containing protein 9 | 0.002 | 0.903±0.036 | 0.872±0.020 | 0.916±0.007 | 0.899±0.028 |
| Beta-hexosaminidase subunit beta                              | 0.002 | 1.296±0.027 | 1.365±0.066 | 1.486±0.129 | 1.554±0.169 |
| Diphosphoinositol polyphosphate phosphohydrolase 2            | 0.002 | 1.216±0.057 | 1.301±0.092 | 1.437±0.043 | 1.587±0.208 |
| Unconventional myosin-VIIb                                    | 0.002 | 1.259±0.024 | 1.371±0.100 | 1.465±0.133 | 1.476±0.158 |
| Cytokine-induced protein with coiled-coil domain              | 0.002 | 0.688±0.021 | 0.516±0.127 | 0.447±0.102 | 0.418±0.114 |
| Endothelial differentiation-related factor 1                  | 0.002 | 0.762±0.075 | 0.617±0.025 | 0.562±0.032 | 0.512±0.078 |
| Lupus La protein                                              | 0.002 | 0.753±0.060 | 0.669±0.038 | 0.608±0.026 | 0.552±0.085 |
| RNA-binding motif protein, X chromosome                       | 0.002 | 0.791±0.037 | 0.679±0.056 | 0.619±0.025 | 0.525±0.047 |
| Nuclear migration protein nudC                                | 0.002 | 0.747±0.026 | 0.692±0.051 | 0.602±0.027 | 0.558±0.065 |
| E3 SUMO-protein ligase RanBP2                                 | 0.003 | 0.861±0.011 | 0.830±0.033 | 0.832±0.055 | 0.730±0.074 |
| Farnesyl pyrophosphate synthase                               | 0.003 | 1.137±0.013 | 1.242±0.088 | 1.241±0.068 | 1.229±0.087 |

|                                                             |       |             |             |             |             |
|-------------------------------------------------------------|-------|-------------|-------------|-------------|-------------|
| ATP-binding cassette sub-family G member 2                  | 0.003 | 1.558±0.140 | 1.761±0.089 | 1.781±0.142 | 1.804±0.219 |
| BRCA2 and CDKN1A-interacting protein                        | 0.003 | 0.697±0.055 | 0.682±0.074 | 0.566±0.029 | 0.515±0.063 |
| Echinoderm microtubule-associated protein-like 4            | 0.003 | 0.872±0.011 | 0.879±0.017 | 0.848±0.022 | 0.819±0.029 |
| Peroxisomal acyl-coenzyme A oxidase 3                       | 0.003 | 1.168±0.049 | 1.193±0.019 | 1.247±0.038 | 1.206±0.024 |
| GMP synthase [glutamine-hydrolyzing]                        | 0.003 | 0.776±0.035 | 0.785±0.060 | 0.702±0.036 | 0.671±0.024 |
| Zinc finger RNA-binding protein                             | 0.003 | 0.852±0.012 | 0.765±0.075 | 0.751±0.074 | 0.716±0.097 |
| CD99 antigen                                                | 0.003 | 0.781±0.027 | 0.636±0.099 | 0.592±0.096 | 0.386±0.035 |
| HSPG2                                                       | 0.003 | 1.131±0.013 | 1.227±0.040 | 1.237±0.050 | 1.316±0.104 |
| U4/U6.U5 tri-snRNP-associated protein 1                     | 0.003 | 0.848±0.037 | 0.792±0.026 | 0.755±0.020 | 0.709±0.059 |
| Splicing factor 3A subunit 1                                | 0.003 | 0.827±0.021 | 0.774±0.034 | 0.734±0.025 | 0.684±0.025 |
| Villin-1                                                    | 0.003 | 1.092±0.025 | 1.123±0.035 | 1.142±0.014 | 1.144±0.051 |
| Pyruvate carboxylase, mitochondrial                         | 0.003 | 1.290±0.031 | 1.331±0.155 | 1.360±0.162 | 1.345±0.134 |
| Eukaryotic translation initiation factor 4E type 2          | 0.003 | 0.823±0.032 | 0.805±0.063 | 0.752±0.021 | 0.683±0.081 |
| Palmitoyl-protein thioesterase 1                            | 0.003 | 0.658±0.028 | 0.634±0.049 | 0.604±0.030 | 0.489±0.046 |
| RNA-binding protein 14                                      | 0.003 | 0.795±0.018 | 0.688±0.050 | 0.653±0.062 | 0.574±0.072 |
| Phosphatidate cytidyltransferase 1                          | 0.003 | 1.126±0.014 | 1.283±0.121 | 1.271±0.090 | 1.309±0.091 |
| Histone-binding protein RBBP7                               | 0.003 | 0.742±0.051 | 0.675±0.059 | 0.591±0.032 | 0.524±0.075 |
| Inosine-5'-monophosphate dehydrogenase 2                    | 0.003 | 0.628±0.029 | 0.559±0.128 | 0.426±0.107 | 0.349±0.115 |
| Eukaryotic translation initiation factor 6                  | 0.003 | 0.868±0.030 | 0.815±0.037 | 0.804±0.021 | 0.770±0.020 |
| Omega-amidase NIT2                                          | 0.004 | 0.859±0.027 | 0.828±0.055 | 0.844±0.016 | 0.821±0.017 |
| Ectonucleoside triphosphate diphosphohydrolase 8            | 0.004 | 1.489±0.061 | 1.455±0.119 | 1.509±0.076 | 1.608±0.144 |
| Peroxisomal acyl-coenzyme A oxidase 2                       | 0.004 | 1.316±0.037 | 1.418±0.092 | 1.490±0.128 | 1.564±0.188 |
| Signal recognition particle subunit SRP72                   | 0.004 | 0.898±0.011 | 0.858±0.051 | 0.840±0.037 | 0.753±0.022 |
| Sodium/glucose cotransporter 1                              | 0.004 | 1.398±0.161 | 1.726±0.098 | 1.940±0.375 | 2.204±0.283 |
| Ectonucleoside triphosphate diphosphohydrolase 5            | 0.004 | 1.257±0.095 | 1.336±0.041 | 1.342±0.092 | 1.387±0.153 |
| 40S ribosomal protein S10                                   | 0.004 | 0.772±0.066 | 0.709±0.048 | 0.638±0.030 | 0.582±0.056 |
| DnaJ homolog subfamily A member 4                           | 0.004 | 1.254±0.107 | 1.212±0.066 | 1.336±0.041 | 1.401±0.138 |
| Regulator of nonsense transcripts 1                         | 0.004 | 0.904±0.020 | 0.854±0.017 | 0.832±0.017 | 0.788±0.043 |
| Scaffold attachment factor B1                               | 0.004 | 0.781±0.044 | 0.690±0.028 | 0.649±0.032 | 0.589±0.079 |
| Nucleolar RNA helicase 2                                    | 0.004 | 0.632±0.071 | 0.519±0.118 | 0.425±0.064 | 0.341±0.041 |
| Junction plakoglobin                                        | 0.004 | 1.597±0.176 | 1.712±0.118 | 1.768±0.130 | 1.774±0.111 |
| Medium-chain specific acyl-CoA dehydrogenase, mitochondrial | 0.004 | 1.164±0.058 | 1.309±0.039 | 1.323±0.066 | 1.362±0.136 |
| Prefoldin subunit 5                                         | 0.004 | 0.838±0.016 | 0.705±0.096 | 0.723±0.092 | 0.681±0.091 |
| Carboxylesterase 3                                          | 0.004 | 1.240±0.101 | 1.313±0.043 | 1.245±0.030 | 1.311±0.120 |
| Nucleophosmin                                               | 0.004 | 0.593±0.061 | 0.550±0.063 | 0.427±0.042 | 0.353±0.091 |
| 2'-deoxynucleoside 5'-phosphate N-hydrolase 1               | 0.004 | 0.873±0.013 | 0.834±0.035 | 0.802±0.036 | 0.768±0.054 |
| Desmoglein-2                                                | 0.004 | 2.069±0.172 | 2.104±0.252 | 2.283±0.367 | 2.356±0.396 |

|                                                                |       |             |             |             |             |
|----------------------------------------------------------------|-------|-------------|-------------|-------------|-------------|
| Procollagen-lysine,2-oxoglutarate 5-dioxygenase 2              | 0.004 | 1.186±0.070 | 1.288±0.125 | 1.406±0.055 | 1.429±0.062 |
| Hydroxymethylglutaryl-CoA synthase, mitochondrial              | 0.004 | 1.520±0.122 | 1.742±0.225 | 1.954±0.222 | 2.089±0.179 |
| Plasminogen activator inhibitor 1 RNA-binding protein          | 0.004 | 0.740±0.055 | 0.685±0.042 | 0.599±0.036 | 0.554±0.079 |
| Very long-chain specific acyl-CoA dehydrogenase, mitochondrial | 0.004 | 1.143±0.050 | 1.326±0.046 | 1.363±0.052 | 1.375±0.051 |
| Catechol O-methyltransferase domain-containing protein 1       | 0.004 | 1.208±0.026 | 1.265±0.063 | 1.216±0.036 | 1.215±0.068 |
| Tissue alpha-L-fucosidase                                      | 0.004 | 1.617±0.201 | 1.812±0.125 | 1.902±0.270 | 2.065±0.379 |
| Xanthine dehydrogenase/oxidase                                 | 0.004 | 1.267±0.039 | 1.345±0.082 | 1.384±0.052 | 1.403±0.059 |
| PEST proteolytic signal-containing nuclear protein             | 0.005 | 0.714±0.028 | 0.617±0.095 | 0.556±0.084 | 0.544±0.116 |
| Histone-binding protein RBBP4                                  | 0.005 | 0.758±0.076 | 0.625±0.034 | 0.621±0.050 | 0.568±0.103 |
| U6 snRNA-associated Sm-like protein LSm6                       | 0.005 | 0.843±0.053 | 0.858±0.016 | 0.800±0.039 | 0.755±0.071 |
| Aspartate--tRNA ligase, mitochondrial                          | 0.005 | 0.949±0.017 | 0.906±0.011 | 0.880±0.018 | 0.875±0.029 |
| Heterogeneous nuclear ribonucleoprotein D0                     | 0.005 | 0.729±0.069 | 0.641±0.047 | 0.596±0.038 | 0.508±0.089 |
| RNA-binding protein 39                                         | 0.005 | 0.796±0.055 | 0.728±0.063 | 0.669±0.064 | 0.615±0.037 |
| Acidic leucine-rich nuclear phosphoprotein 32 family member A  | 0.005 | 0.844±0.052 | 0.727±0.034 | 0.733±0.029 | 0.718±0.031 |
| SWI/SNF complex subunit SMARCC1                                | 0.005 | 0.692±0.075 | 0.543±0.073 | 0.478±0.044 | 0.406±0.126 |
| Actin-like protein 6A                                          | 0.005 | 0.890±0.013 | 0.863±0.042 | 0.794±0.029 | 0.779±0.054 |
| Serpin H1                                                      | 0.005 | 1.132±0.028 | 1.192±0.027 | 1.192±0.061 | 1.228±0.042 |
| Thioredoxin domain-containing protein 5                        | 0.005 | 0.882±0.014 | 0.814±0.028 | 0.803±0.030 | 0.789±0.071 |
| Pre-mRNA-processing factor 19                                  | 0.005 | 0.795±0.048 | 0.740±0.032 | 0.688±0.033 | 0.635±0.099 |
| Ubiquitin-like protein 3                                       | 0.005 | 1.320±0.056 | 1.456±0.078 | 1.491±0.076 | 1.502±0.182 |
| Eukaryotic translation initiation factor 3 subunit J           | 0.006 | 0.842±0.027 | 0.768±0.029 | 0.728±0.030 | 0.678±0.077 |
| Eukaryotic translation initiation factor 3 subunit K           | 0.006 | 0.903±0.029 | 0.810±0.022 | 0.817±0.045 | 0.786±0.027 |
| U1 small nuclear ribonucleoprotein A                           | 0.006 | 0.794±0.072 | 0.767±0.027 | 0.703±0.038 | 0.654±0.092 |
| Ubiquitin-associated protein 2-like                            | 0.006 | 0.720±0.051 | 0.615±0.071 | 0.574±0.043 | 0.550±0.066 |
| Protein phosphatase 1 regulatory subunit 3G                    | 0.006 | 1.239±0.035 | 1.265±0.046 | 1.394±0.187 | 1.325±0.114 |
| Ly6/PLAUR domain-containing protein 8                          | 0.006 | 2.117±0.215 | 2.137±0.502 | 2.459±0.396 | 2.642±0.927 |
| 28 kDa heat- and acid-stable phosphoprotein                    | 0.006 | 0.774±0.065 | 0.685±0.035 | 0.644±0.061 | 0.577±0.089 |
| Heat shock 70 kDa protein 4L                                   | 0.006 | 0.787±0.050 | 0.738±0.031 | 0.682±0.055 | 0.624±0.109 |
| Inter-alpha-trypsin inhibitor heavy chain H4                   | 0.006 | 1.456±0.076 | 1.776±0.310 | 1.791±0.320 | 1.977±0.195 |
| Cell division cycle and apoptosis regulator protein 1          | 0.006 | 0.801±0.036 | 0.704±0.065 | 0.663±0.037 | 0.606±0.065 |
| S-adenosylmethionine synthase isoform type-2                   | 0.006 | 0.877±0.016 | 0.886±0.033 | 0.783±0.037 | 0.759±0.037 |
| Solute carrier family 15 member 1                              | 0.006 | 1.556±0.094 | 1.675±0.138 | 1.725±0.147 | 1.806±0.361 |
| Constitutive coactivator of PPAR-gamma-like protein 1          | 0.006 | 0.933±0.021 | 0.901±0.013 | 0.893±0.040 | 0.816±0.024 |
| Splicing factor 3B subunit 1                                   | 0.007 | 0.830±0.050 | 0.796±0.025 | 0.734±0.037 | 0.654±0.108 |
| Sulfotransferase family cytosolic 1B member 1                  | 0.007 | 1.533±0.184 | 1.585±0.199 | 1.680±0.124 | 1.736±0.367 |
| 60S ribosomal protein L12                                      | 0.007 | 0.783±0.027 | 0.769±0.049 | 0.690±0.056 | 0.650±0.082 |
| Nuclease-sensitive element-binding protein 1                   | 0.007 | 0.783±0.057 | 0.713±0.035 | 0.623±0.049 | 0.555±0.074 |

|                                                           |       |             |             |             |             |
|-----------------------------------------------------------|-------|-------------|-------------|-------------|-------------|
| Calcium-activated chloride channel regulator 4            | 0.007 | 2.029±0.281 | 2.236±0.506 | 2.311±0.269 | 3.006±0.742 |
| Aldose 1-epimerase                                        | 0.007 | 1.157±0.052 | 1.169±0.046 | 1.262±0.084 | 1.294±0.049 |
| Serine/arginine repetitive matrix protein 2               | 0.007 | 0.760±0.031 | 0.703±0.088 | 0.647±0.074 | 0.629±0.074 |
| 40S ribosomal protein SA                                  | 0.007 | 0.793±0.061 | 0.722±0.036 | 0.648±0.043 | 0.615±0.089 |
| H/ACA ribonucleoprotein complex subunit DKC1              | 0.007 | 0.762±0.031 | 0.742±0.036 | 0.675±0.075 | 0.613±0.096 |
| Peroxisomal acyl-coenzyme A oxidase 1                     | 0.007 | 1.252±0.093 | 1.243±0.091 | 1.373±0.082 | 1.457±0.081 |
| Mitochondrial-processing peptidase subunit alpha          | 0.007 | 0.803±0.068 | 0.819±0.032 | 0.776±0.030 | 0.718±0.058 |
| RNA-binding protein 4                                     | 0.008 | 0.824±0.027 | 0.729±0.047 | 0.723±0.035 | 0.640±0.099 |
| Nuclear pore complex protein Nup98-Nup96                  | 0.008 | 0.796±0.035 | 0.705±0.090 | 0.639±0.079 | 0.598±0.046 |
| Branched-chain-amino-acid aminotransferase, mitochondrial | 0.008 | 0.814±0.034 | 0.824±0.024 | 0.791±0.048 | 0.735±0.068 |
| Enhancer of mRNA-decapping protein 3                      | 0.008 | 0.729±0.085 | 0.719±0.048 | 0.672±0.061 | 0.666±0.042 |
| Nascent polypeptide-associated complex subunit alpha-2    | 0.008 | 0.788±0.044 | 0.728±0.053 | 0.640±0.044 | 0.611±0.054 |
| WD40 repeat-containing protein SMU1                       | 0.008 | 0.833±0.047 | 0.883±0.017 | 0.755±0.054 | 0.692±0.099 |
| Talin-1                                                   | 0.008 | 0.919±0.012 | 0.892±0.016 | 0.881±0.020 | 0.867±0.050 |
| Vinculin                                                  | 0.008 | 1.095±0.015 | 1.237±0.065 | 1.178±0.060 | 1.188±0.049 |
| Translation machinery-associated protein 7                | 0.008 | 0.631±0.067 | 0.569±0.098 | 0.485±0.055 | 0.439±0.094 |
| Natural resistance-associated macrophage protein 2        | 0.008 | 1.911±0.419 | 2.203±0.427 | 2.564±0.357 | 2.683±0.543 |
| RNA-binding protein Musashi homolog 2                     | 0.008 | 0.913±0.022 | 0.829±0.043 | 0.800±0.043 | 0.807±0.027 |
| Peptidyl-prolyl cis-trans isomerase D                     | 0.008 | 0.891±0.019 | 0.848±0.024 | 0.800±0.028 | 0.788±0.070 |
| Beta-galactosidase                                        | 0.008 | 1.321±0.066 | 1.462±0.087 | 1.581±0.171 | 1.619±0.180 |
| MAGUK p55 subfamily member 7                              | 0.008 | 1.052±0.017 | 1.146±0.047 | 1.108±0.018 | 1.183±0.052 |
| Tubulin beta-4B chain                                     | 0.008 | 0.872±0.022 | 0.882±0.036 | 0.832±0.031 | 0.785±0.031 |
| Desmocollin-2                                             | 0.009 | 1.386±0.072 | 1.345±0.109 | 1.385±0.134 | 1.427±0.123 |
| Transmembrane protease serine 2                           | 0.009 | 1.532±0.109 | 1.627±0.196 | 1.828±0.180 | 2.077±0.472 |
| Treacle protein                                           | 0.009 | 0.726±0.055 | 0.635±0.047 | 0.587±0.078 | 0.530±0.132 |
| NHP2-like protein 1                                       | 0.009 | 0.688±0.042 | 0.570±0.076 | 0.529±0.084 | 0.473±0.107 |
| Nucleolar and coiled-body phosphoprotein 1                | 0.009 | 0.627±0.051 | 0.534±0.056 | 0.440±0.063 | 0.366±0.104 |
| Hsp90 co-chaperone Cdc37                                  | 0.009 | 0.907±0.030 | 0.864±0.046 | 0.839±0.025 | 0.831±0.029 |
| High mobility group protein HMG-I/HMG-Y                   | 0.009 | 0.841±0.024 | 0.784±0.076 | 0.772±0.066 | 0.753±0.070 |
| Transcription intermediary factor 1-beta                  | 0.009 | 0.744±0.037 | 0.625±0.089 | 0.579±0.085 | 0.504±0.107 |
| Fucose mutarotase                                         | 0.010 | 1.436±0.133 | 1.759±0.253 | 1.832±0.186 | 2.041±0.575 |
| ENPP3                                                     | 0.010 | 1.407±0.150 | 1.598±0.182 | 1.812±0.194 | 2.038±0.250 |
| Aminopeptidase N                                          | 0.010 | 1.909±0.213 | 2.010±0.247 | 1.854±0.271 | 2.002±0.361 |
| DNA replication licensing factor MCM3                     | 0.010 | 0.697±0.071 | 0.570±0.055 | 0.443±0.068 | 0.343±0.125 |
| Probable 28S rRNA (cytosine(4447)-C(5))-methyltransferase | 0.010 | 0.735±0.061 | 0.598±0.085 | 0.513±0.058 | 0.425±0.115 |
| Heterogeneous nuclear ribonucleoprotein A1                | 0.010 | 0.742±0.039 | 0.664±0.106 | 0.587±0.089 | 0.540±0.103 |
| 60S ribosomal protein L18                                 | 0.010 | 0.760±0.041 | 0.784±0.046 | 0.716±0.046 | 0.629±0.051 |

|                                                               |       |             |             |             |             |
|---------------------------------------------------------------|-------|-------------|-------------|-------------|-------------|
| 60S ribosomal protein L19                                     | 0.010 | 0.774±0.045 | 0.723±0.045 | 0.684±0.045 | 0.597±0.064 |
| Pre-mRNA-processing factor 40 homolog A                       | 0.010 | 0.848±0.052 | 0.787±0.033 | 0.804±0.056 | 0.767±0.062 |
| Eukaryotic translation initiation factor 3 subunit A          | 0.010 | 0.849±0.025 | 0.831±0.044 | 0.786±0.036 | 0.727±0.068 |
| Multifunctional methyltransferase subunit TRM112-like protein | 0.010 | 0.725±0.079 | 0.617±0.053 | 0.566±0.059 | 0.478±0.104 |
| Glycogen debranching enzyme                                   | 0.010 | 1.088±0.026 | 1.121±0.045 | 1.137±0.035 | 1.171±0.033 |
| Heterogeneous nuclear ribonucleoprotein K                     | 0.010 | 0.800±0.054 | 0.700±0.045 | 0.656±0.055 | 0.596±0.055 |
| Beta-glucuronidase                                            | 0.011 | 1.287±0.058 | 1.513±0.228 | 1.510±0.170 | 2.002±0.270 |
| Caprin-1                                                      | 0.011 | 0.799±0.033 | 0.726±0.042 | 0.676±0.053 | 0.653±0.053 |
| 4F2 cell-surface antigen heavy chain                          | 0.011 | 0.813±0.048 | 0.783±0.034 | 0.686±0.060 | 0.623±0.076 |
| RNA transcription, translation and transport factor protein   | 0.011 | 0.861±0.040 | 0.788±0.035 | 0.764±0.037 | 0.728±0.055 |
| Heterogeneous nuclear ribonucleoprotein F                     | 0.011 | 0.790±0.045 | 0.692±0.046 | 0.663±0.060 | 0.597±0.091 |
| Cyclin-dependent kinase 12                                    | 0.011 | 0.787±0.068 | 0.727±0.042 | 0.732±0.055 | 0.618±0.068 |
| Phytanoyl-CoA dioxygenase, peroxisomal                        | 0.011 | 1.119±0.025 | 1.275±0.115 | 1.321±0.068 | 1.357±0.127 |
| Peroxiredoxin-like 2A                                         | 0.012 | 1.296±0.062 | 1.469±0.142 | 1.527±0.138 | 1.597±0.184 |
| P2X purinoceptor 4                                            | 0.012 | 1.411±0.135 | 1.516±0.167 | 1.567±0.130 | 1.630±0.267 |
| Cadherin-related family member 5                              | 0.012 | 1.507±0.143 | 1.613±0.148 | 1.768±0.230 | 1.949±0.478 |
| Translation initiation factor eIF-2B subunit gamma            | 0.012 | 0.823±0.044 | 0.721±0.081 | 0.710±0.047 | 0.680±0.072 |
| Apoptosis-associated speck-like protein containing a CARD     | 0.012 | 0.786±0.071 | 0.705±0.084 | 0.630±0.057 | 0.594±0.129 |
| Splicing factor 3A subunit 3                                  | 0.012 | 0.818±0.041 | 0.777±0.055 | 0.749±0.042 | 0.690±0.077 |
| C-1-tetrahydrofolate synthase, cytoplasmic                    | 0.012 | 0.806±0.048 | 0.752±0.053 | 0.704±0.048 | 0.621±0.065 |
| 40S ribosomal protein S5                                      | 0.012 | 0.841±0.039 | 0.750±0.041 | 0.709±0.081 | 0.685±0.109 |
| Heterogeneous nuclear ribonucleoprotein U-like protein 1      | 0.012 | 0.832±0.054 | 0.802±0.034 | 0.770±0.044 | 0.711±0.087 |
| Sigma intracellular receptor 2                                | 0.012 | 1.304±0.120 | 1.484±0.123 | 1.396±0.090 | 1.325±0.124 |
| Receptor-type tyrosine-protein phosphatase F                  | 0.012 | 0.559±0.086 | 0.545±0.111 | 0.499±0.075 | 0.449±0.069 |
| SH3 domain-binding glutamic acid-rich-like protein            | 0.012 | 0.701±0.049 | 0.611±0.115 | 0.573±0.096 | 0.557±0.108 |
| DnaJ homolog subfamily C member 7                             | 0.012 | 0.799±0.049 | 0.787±0.037 | 0.692±0.055 | 0.649±0.097 |
| Translation initiation factor eIF-2B subunit epsilon          | 0.013 | 0.842±0.053 | 0.820±0.032 | 0.745±0.071 | 0.686±0.087 |
| Guanine nucleotide-binding protein subunit alpha-11           | 0.013 | 1.302±0.067 | 1.439±0.150 | 1.562±0.251 | 1.570±0.210 |
| Syndecan-1                                                    | 0.013 | 0.771±0.040 | 0.736±0.056 | 0.731±0.048 | 0.755±0.061 |
| Actin-histidine N-methyltransferase                           | 0.013 | 0.843±0.051 | 0.833±0.030 | 0.737±0.051 | 0.706±0.058 |
| Replication factor C subunit 4                                | 0.013 | 0.681±0.106 | 0.635±0.059 | 0.559±0.076 | 0.492±0.114 |
| Carnitine O-palmitoyltransferase 1, liver isoform             | 0.013 | 1.196±0.078 | 1.278±0.062 | 1.353±0.102 | 1.360±0.145 |
| La-related protein 1                                          | 0.013 | 0.801±0.036 | 0.697±0.079 | 0.643±0.071 | 0.599±0.069 |
| E3 ubiquitin-protein ligase HUWE1                             | 0.014 | 0.919±0.030 | 0.900±0.026 | 0.903±0.019 | 0.862±0.044 |
| Proline-, glutamic acid- and leucine-rich protein 1           | 0.014 | 0.818±0.033 | 0.767±0.065 | 0.738±0.069 | 0.650±0.106 |
| Protein RCC2                                                  | 0.014 | 0.735±0.047 | 0.745±0.079 | 0.624±0.097 | 0.544±0.124 |
| 40S ribosomal protein S11                                     | 0.014 | 0.759±0.079 | 0.783±0.061 | 0.692±0.052 | 0.645±0.108 |

|                                                                 |       |             |             |             |             |
|-----------------------------------------------------------------|-------|-------------|-------------|-------------|-------------|
| Non-POU domain-containing octamer-binding protein               | 0.014 | 0.743±0.081 | 0.699±0.051 | 0.668±0.086 | 0.586±0.131 |
| Heterogeneous nuclear ribonucleoprotein H                       | 0.014 | 0.848±0.032 | 0.760±0.051 | 0.733±0.046 | 0.686±0.078 |
| Inositol 1,4,5-trisphosphate receptor type 3                    | 0.014 | 1.244±0.055 | 1.359±0.124 | 1.442±0.121 | 1.450±0.130 |
| Stress-induced-phosphoprotein 1                                 | 0.014 | 0.878±0.024 | 0.791±0.048 | 0.780±0.060 | 0.773±0.071 |
| Monofunctional C1-tetrahydrofolate synthase, mitochondrial      | 0.014 | 0.839±0.037 | 0.791±0.058 | 0.730±0.049 | 0.594±0.093 |
| Gelsolin                                                        | 0.015 | 1.218±0.065 | 1.231±0.072 | 1.360±0.088 | 1.478±0.175 |
| Proliferation marker protein Ki-67                              | 0.015 | 0.576±0.084 | 0.482±0.113 | 0.391±0.130 | 0.314±0.083 |
| ATP-binding cassette sub-family D member 3                      | 0.015 | 1.176±0.046 | 1.306±0.138 | 1.357±0.095 | 1.307±0.076 |
| Histone H1.5                                                    | 0.015 | 0.732±0.071 | 0.663±0.059 | 0.639±0.081 | 0.577±0.104 |
| Protein FAM50A                                                  | 0.016 | 0.820±0.051 | 0.814±0.046 | 0.764±0.045 | 0.736±0.052 |
| Secretory carrier-associated membrane protein 3                 | 0.016 | 0.894±0.022 | 0.873±0.033 | 0.810±0.061 | 0.762±0.063 |
| DNA repair protein XRCC1                                        | 0.016 | 0.730±0.079 | 0.691±0.056 | 0.618±0.112 | 0.564±0.135 |
| Host cell factor 1                                              | 0.016 | 0.769±0.071 | 0.766±0.067 | 0.696±0.057 | 0.662±0.105 |
| Procollagen lysine hydroxylase and glycosyltransferase LH3      | 0.016 | 1.147±0.047 | 1.193±0.047 | 1.294±0.097 | 1.334±0.111 |
| Cytosolic 10-formyltetrahydrofolate dehydrogenase               | 0.016 | 1.143±0.054 | 1.210±0.051 | 1.318±0.088 | 1.376±0.127 |
| Sterol 26-hydroxylase, mitochondrial                            | 0.017 | 1.791±0.351 | 2.018±0.308 | 2.156±0.416 | 2.233±0.574 |
| Chloride anion exchanger                                        | 0.017 | 1.773±0.291 | 1.911±0.426 | 1.889±0.284 | 2.098±0.385 |
| Hephaestin                                                      | 0.018 | 1.501±0.173 | 1.647±0.280 | 1.830±0.261 | 1.833±0.264 |
| Nascent polypeptide-associated complex subunit alpha            | 0.018 | 0.792±0.051 | 0.736±0.073 | 0.644±0.066 | 0.601±0.099 |
| Peptidyl-prolyl cis-trans isomerase G                           | 0.018 | 0.800±0.062 | 0.775±0.078 | 0.780±0.060 | 0.684±0.064 |
| Splicing factor, proline- and glutamine-rich                    | 0.018 | 0.833±0.057 | 0.808±0.053 | 0.746±0.052 | 0.677±0.076 |
| Major vault protein                                             | 0.019 | 1.205±0.087 | 1.283±0.093 | 1.319±0.086 | 1.393±0.169 |
| 40S ribosomal protein S12                                       | 0.019 | 0.748±0.054 | 0.621±0.091 | 0.578±0.104 | 0.574±0.118 |
| Cell cycle and apoptosis regulator protein 2                    | 0.019 | 0.855±0.036 | 0.846±0.046 | 0.788±0.047 | 0.760±0.053 |
| Eukaryotic translation initiation factor 2 subunit 1            | 0.020 | 0.879±0.039 | 0.853±0.034 | 0.835±0.039 | 0.788±0.050 |
| Histone H1.2                                                    | 0.020 | 0.722±0.087 | 0.662±0.074 | 0.661±0.067 | 0.591±0.105 |
| SUMO-conjugating enzyme UBC9                                    | 0.020 | 0.797±0.066 | 0.742±0.057 | 0.712±0.060 | 0.687±0.092 |
| Deoxyuridine 5'-triphosphate nucleotidohydrolase, mitochondrial | 0.020 | 0.762±0.058 | 0.600±0.097 | 0.537±0.081 | 0.458±0.146 |
| DNA mismatch repair protein Msh2                                | 0.021 | 0.742±0.085 | 0.709±0.092 | 0.615±0.073 | 0.550±0.112 |
| Splicing factor 3B subunit 5                                    | 0.021 | 0.822±0.041 | 0.752±0.070 | 0.686±0.084 | 0.695±0.066 |
| Polypeptide N-acetylgalactosaminyltransferase 12                | 0.022 | 1.196±0.060 | 1.266±0.089 | 1.297±0.089 | 1.287±0.112 |
| Ras GTPase-activating protein-binding protein 1                 | 0.022 | 0.749±0.074 | 0.611±0.101 | 0.554±0.085 | 0.471±0.098 |
| U2 small nuclear ribonucleoprotein A'                           | 0.023 | 0.808±0.057 | 0.758±0.075 | 0.750±0.075 | 0.654±0.072 |
| StAR-related lipid transfer protein 5                           | 0.023 | 1.204±0.065 | 1.221±0.091 | 1.297±0.089 | 1.221±0.094 |
| 40S ribosomal protein S19                                       | 0.023 | 0.770±0.066 | 0.721±0.064 | 0.647±0.077 | 0.617±0.095 |
| Glycogen phosphorylase, brain form                              | 0.023 | 1.271±0.081 | 1.412±0.182 | 1.577±0.225 | 1.667±0.270 |
| Lysosome membrane protein 2                                     | 0.024 | 1.261±0.084 | 1.295±0.123 | 1.366±0.149 | 1.384±0.120 |

|                                                       |       |             |             |             |             |
|-------------------------------------------------------|-------|-------------|-------------|-------------|-------------|
| Dehydrogenase/reductase SDR family member 7           | 0.024 | 1.407±0.176 | 1.569±0.184 | 1.683±0.225 | 1.838±0.316 |
| Peptidyl-prolyl cis-trans isomerase FKBP3             | 0.024 | 0.804±0.053 | 0.751±0.073 | 0.713±0.068 | 0.687±0.099 |
| Peptidyl-prolyl cis-trans isomerase FKBP4             | 0.024 | 0.860±0.036 | 0.827±0.054 | 0.766±0.067 | 0.747±0.067 |
| ATP-dependent 6-phosphofructokinase, liver type       | 0.024 | 1.143±0.044 | 1.193±0.082 | 1.278±0.110 | 1.276±0.083 |
| Calcium-binding mitochondrial carrier protein Aralar2 | 0.026 | 1.152±0.058 | 1.288±0.093 | 1.320±0.110 | 1.380±0.133 |
| Chromatin complexes subunit BAP18                     | 0.026 | 0.856±0.044 | 0.752±0.069 | 0.723±0.066 | 0.708±0.076 |
| Serine/threonine-protein kinase VRK1                  | 0.027 | 0.700±0.071 | 0.610±0.109 | 0.524±0.105 | 0.405±0.117 |
| Long-chain-fatty-acid--CoA ligase 5                   | 0.028 | 1.369±0.155 | 1.451±0.165 | 1.582±0.202 | 1.649±0.297 |
| Zinc transporter ZIP4                                 | 0.028 | 2.012±0.545 | 2.077±0.457 | 2.628±0.769 | 2.833±0.958 |
| Serrate RNA effector molecule homolog                 | 0.028 | 0.814±0.063 | 0.776±0.064 | 0.744±0.064 | 0.692±0.091 |
| Amine oxidase [flavin-containing] A                   | 0.028 | 1.344±0.135 | 1.457±0.156 | 1.475±0.174 | 1.580±0.262 |
| Splicing factor 3B subunit 3                          | 0.028 | 0.833±0.049 | 0.806±0.061 | 0.752±0.065 | 0.696±0.098 |
| Paraspeckle component 1                               | 0.028 | 0.853±0.048 | 0.811±0.063 | 0.785±0.058 | 0.720±0.088 |
| Heterogeneous nuclear ribonucleoprotein U             | 0.031 | 0.744±0.069 | 0.643±0.087 | 0.618±0.090 | 0.547±0.121 |
| Chloride intracellular channel protein 3              | 0.035 | 1.373±0.143 | 1.328±0.135 | 1.504±0.199 | 1.500±0.240 |
| Mitochondrial proton/calcium exchanger protein        | 0.037 | 1.140±0.050 | 1.173±0.069 | 1.211±0.085 | 1.251±0.097 |

These values represent average fold change (of abundance ratio) compared with control conditions (0.15 mM calcium) ± SDs. These proteins were up- or down-regulated and were significant ( $p < 0.05$ ) across the three colonoids and all culture conditions based on  $p$  value ( $< 0.05$ ) calculated by nested-designed experiments. \*Represents significance in up- or down-regulation as compared to the control at  $p < 0.05$  level.



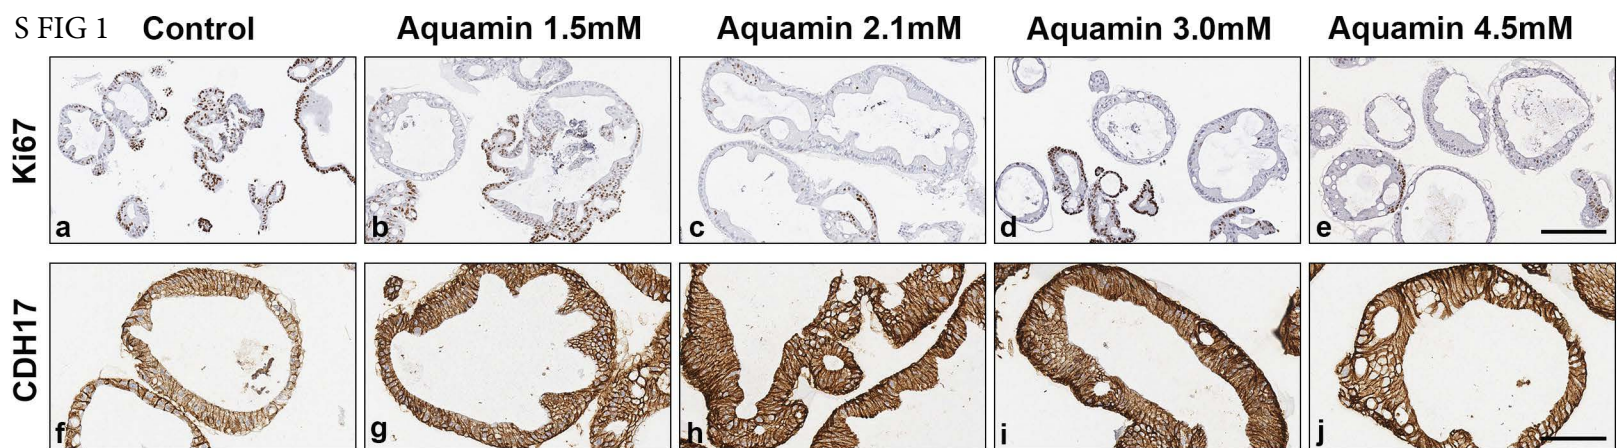

### Quantitative IHC

k. Ki67

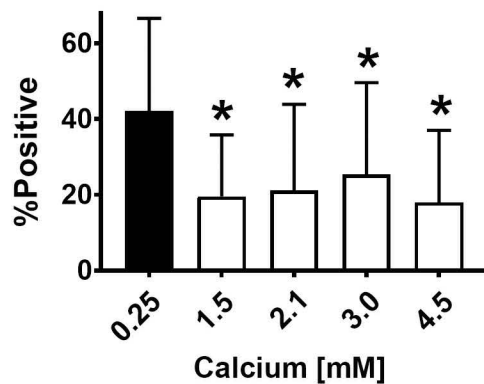

l. CDH17

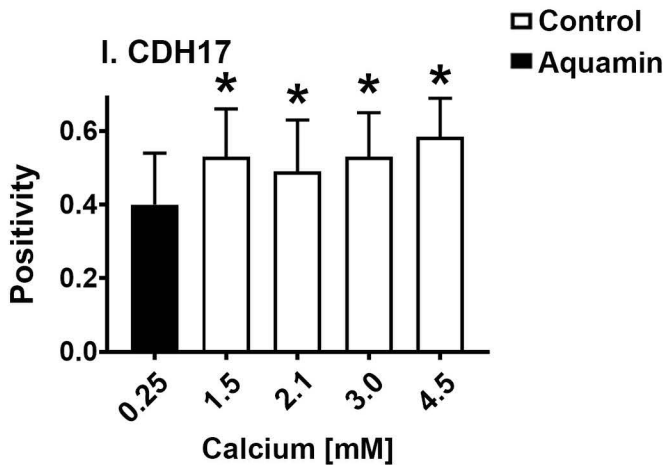

**Aquamin (1.5mM)**

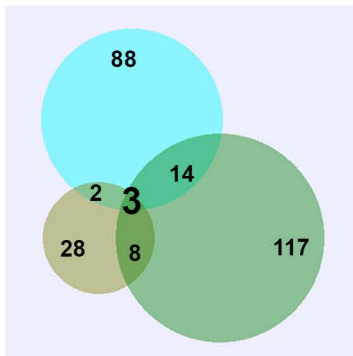

**Aquamin (2.1mM)**

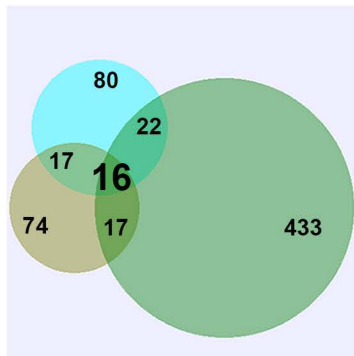

**Aquamin (3.0mM)**

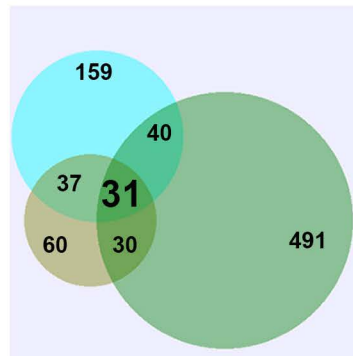

**Aquamin (4.5mM)**

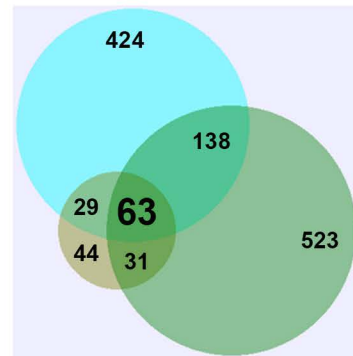

S FIG 2

Subject# 125 127 128

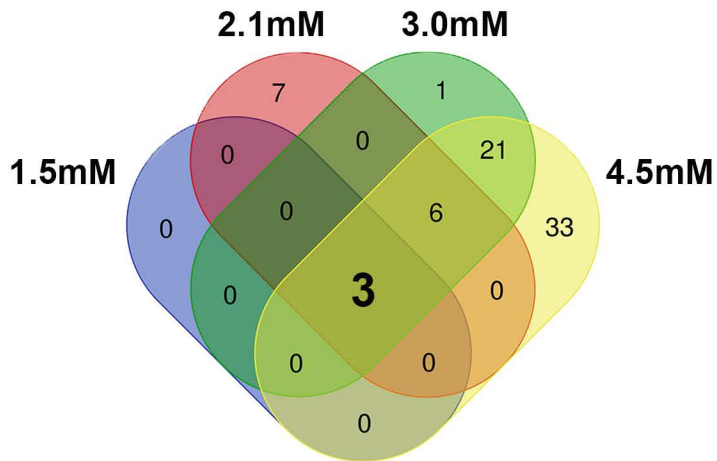

Three common proteins:  
DSG2  
CDH17  
LYPD8
